# Supplementary material for: Evaluation of the Pathogenic Potential of Escherichia coli Strains Isolated from Eye Infections
Source: MDPI journal article supplement (doi:10.3390/microorganisms10061084), 2022-05-25
Supplement: s1 [file s1]

**Table S1.** Clinical details of patients with eye infections caused by *Escherichia coli* strains

| Strain       | Gender <sup>a</sup> | Age <sup>b</sup> | Date     | Diagnosis                  | Sample            | Eye <sup>c</sup> | Signs and symptoms                                                                   |
|--------------|---------------------|------------------|----------|----------------------------|-------------------|------------------|--------------------------------------------------------------------------------------|
| K-1          | M                   | 49 y             | 13/11/11 | Keratitis                  | Corneal scraping  | OD               | Pain, grittiness, hyperemia, discharge, photophobia, epiphora and decreased vision   |
| K-2          | M                   | 47 y             | 12/07/11 | Keratitis                  | Corneal scraping  | OD               | Pain, epiphora, hyperemia, photophobia, and grittiness                               |
| K-3          | F                   | -                | 24/04/06 | Keratitis                  | Contact lenses    | OS               | -                                                                                    |
| K-4          | F                   | 86 y             | 15/12/15 | Keratitis                  | Corneal scraping  | OS               | Hyperemia, discharge, and decreased vision                                           |
| K-5          | F                   | 50 y             | 23/11/18 | Keratitis                  | Corneal scraping  | OS               | Itchiness, pain, hyperemia, discharge, photophobia, grittiness, and decreased vision |
| K-6          | M                   | 76 y             | 11/12/17 | Keratitis                  | Corneal scraping  | OS               | Itchiness, hyperemia, photophobia, grittiness, and decreased vision                  |
| C-1          | F                   | 50 y             | 02/10/06 | Conjunctivitis             | Conjunctival swab | OD               | Nyctalopia, pain, epiphora, and photophobia                                          |
| C-2          | M                   | 2 m              | 17/06/08 | Neonatal<br>Conjunctivitis | Conjunctival swab | OD               | -                                                                                    |
| C-3a<br>C-3b | F                   | 71 y             | 08/05/07 | Conjunctivitis             | Conjunctival swab | OS               | Hyperemia, discharge, photophobia, and epiphora                                      |
| C-4          | F                   | 72 y             | 18/06/07 | Conjunctivitis             | Conjunctival swab | OS               | Dry eye and discharge                                                                |
| C-5          | M                   | 64 y             | 01/06/09 | Conjunctivitis             | Conjunctival swab | OS               | Itchiness, hyperemia, and epiphora                                                   |
| C-6          | F                   | 62 y             | 12/03/14 | Conjunctivitis             | Conjunctival swab | OD               | Itchiness, hyperemia, and discharge                                                  |
| C-7          | F                   | -                | 12/06/19 | Conjunctivitis             | Conjunctival swab | OD               | -                                                                                    |
| C-8          | M                   | 3 m              | 05/04/05 | Neonatal<br>Conjunctivitis | Conjunctival swab | OD               | Hyperemia and discharge                                                              |
| C-9          | M                   | 3 m              | 19/04/05 | Neonatal<br>Conjunctivitis | Conjunctival swab | OD               | -                                                                                    |
| C-10         | M                   | 58 d             | 12/12/11 | Neonatal<br>Conjunctivitis | Conjunctival swab | OD               | Hyperemia, discharge, and epiphora                                                   |
| C-11         | M                   | 16 d             | 30/08/18 | Neonatal<br>Conjunctivitis | Conjunctival swab | OD               | Hyperemia and discharge                                                              |

**Table S1.Cont.**

| <b>Strain</b> | <b>Gender</b> | <b>Age</b> | <b>Date</b> | <b>Diagnosis</b>           | <b>Sample</b>     | <b>Eye</b> | <b>Signs and symptoms</b> |
|---------------|---------------|------------|-------------|----------------------------|-------------------|------------|---------------------------|
| C-12          | M             | 5 m        | 10/01/11    | Neonatal<br>Conjunctivitis | Conjunctival swab | OD         | Discharge                 |
| C-13          | M             | 9 d        | 25/08/14    | Neonatal<br>Conjunctivitis | Conjunctival swab | OD         | Discharge and hyperemia   |
| C-14          | M             | 2 m        | 30/01/06    | Neonatal<br>Conjunctivitis | Conjunctival swab | OD         | Discharge                 |
| C-15          | F             | 25 d       | 04/09/06    | Neonatal<br>Conjunctivitis | Conjunctival swab | OS         | Discharge                 |

<sup>a</sup>. M, male; F, female.

<sup>b</sup>. y, years; m, months; d, days.

<sup>c</sup>. OD: Right eye; OS: Left eye. All unknown data is represented by a “-”

**Table S2.** Antibiotic susceptibility profile of *Escherichia coli* strains isolated from eye infections <sup>a</sup>

| Antibiotic and class    | K-1 | K-2 | K-3 | K-4 | K-5 | K-6 | C-1 | C-2 | C-3a | C-3b | C-4 | C-5 | C-6 | C-7 | C-8 | C-9 | C-10 | C-11 | C-12 | C-13 | C-14 | C-15 |
|-------------------------|-----|-----|-----|-----|-----|-----|-----|-----|------|------|-----|-----|-----|-----|-----|-----|------|------|------|------|------|------|
| <b>Aminoglycosides</b>  |     |     |     |     |     |     |     |     |      |      |     |     |     |     |     |     |      |      |      |      |      |      |
| · Amikacin              | S   | S   | S   | S   | S   | S   | S   | S   | S    | S    | S   | S   | S   | S   | S   | S   | S    | S    | S    | S    | S    | S    |
| · Gentamicin            | S   | S   | S   | S   | R   | S   | S   | S   | S    | S    | S   | S   | S   | S   | S   | S   | S    | S    | S    | S    | S    | S    |
| <b>β-lactam</b>         |     |     |     |     |     |     |     |     |      |      |     |     |     |     |     |     |      |      |      |      |      |      |
| <b>Cephalosporins</b>   |     |     |     |     |     |     |     |     |      |      |     |     |     |     |     |     |      |      |      |      |      |      |
| · Cefepime              | S   | S   | S   | S   | S   | S   | S   | S   | S    | S    | S   | S   | S   | S   | S   | S   | S    | S    | S    | S    | S    | S    |
| · Cefoxitin             | S   | S   | S   | S   | S   | S   | S   | S   | S    | S    | S   | S   | S   | S   | S   | S   | S    | S    | S    | S    | S    | S    |
| · Cefotaxime            | S   | S   | S   | S   | S   | S   | S   | S   | S    | S    | S   | S   | S   | S   | S   | S   | S    | S    | S    | S    | S    | S    |
| · Ceftazidime           | S   | S   | S   | S   | S   | S   | S   | S   | S    | S    | S   | S   | S   | S   | S   | S   | S    | S    | S    | S    | S    | S    |
| <b>Monobactam</b>       |     |     |     |     |     |     |     |     |      |      |     |     |     |     |     |     |      |      |      |      |      |      |
| · Aztreonam             | S   | S   | S   | S   | S   | S   | S   | S   | S    | S    | S   | S   | S   | S   | S   | S   | S    | S    | S    | S    | S    | S    |
| <b>Carbapenem</b>       |     |     |     |     |     |     |     |     |      |      |     |     |     |     |     |     |      |      |      |      |      |      |
| · Imipenem              | S   | S   | S   | S   | S   | S   | S   | S   | S    | S    | S   | S   | S   | S   | S   | S   | S    | S    | S    | S    | S    | S    |
| · Ertapenem             | S   | S   | S   | S   | S   | S   | S   | S   | R    | S    | S   | S   | S   | S   | S   | S   | S    | S    | S    | S    | S    | S    |
| · Meropenem             | S   | S   | S   | S   | S   | S   | S   | S   | S    | S    | S   | S   | S   | S   | S   | S   | S    | S    | S    | S    | S    | S    |
| <b>Fluoroquinolones</b> |     |     |     |     |     |     |     |     |      |      |     |     |     |     |     |     |      |      |      |      |      |      |
| · Ciprofloxacin         | S   | S   | S   | R   | R   | S   | S   | S   | S    | S    | S   | R   | R   | S   | R   | R   | S    | S    | S    | S    | S    | S    |
| <b>Glycylcyclines</b>   |     |     |     |     |     |     |     |     |      |      |     |     |     |     |     |     |      |      |      |      |      |      |
| · Tigecycline           | S   | S   | S   | S   | S   | S   | S   | S   | S    | S    | S   | S   | S   | S   | S   | S   | S    | S    | S    | S    | S    | S    |

<sup>a</sup>. S, Sensitive; R, Resistant.
